# Supplementary material for: Development and Characterizations of Pullulan and Maltodextrin-Based Oral Fast-Dissolving Films Employing a Box–Behnken Experimental Design
Source: MDPI journal article supplement (doi:10.3390/ma15103591), 2022-05-18
Supplement: s1 [file s1]

*Supplementary Information*

## **Development and Characterizations of Pullulan and Maltodextrin-Based Oral Fast-Dissolving Films Employing a Box–Behnken Experimental Design**

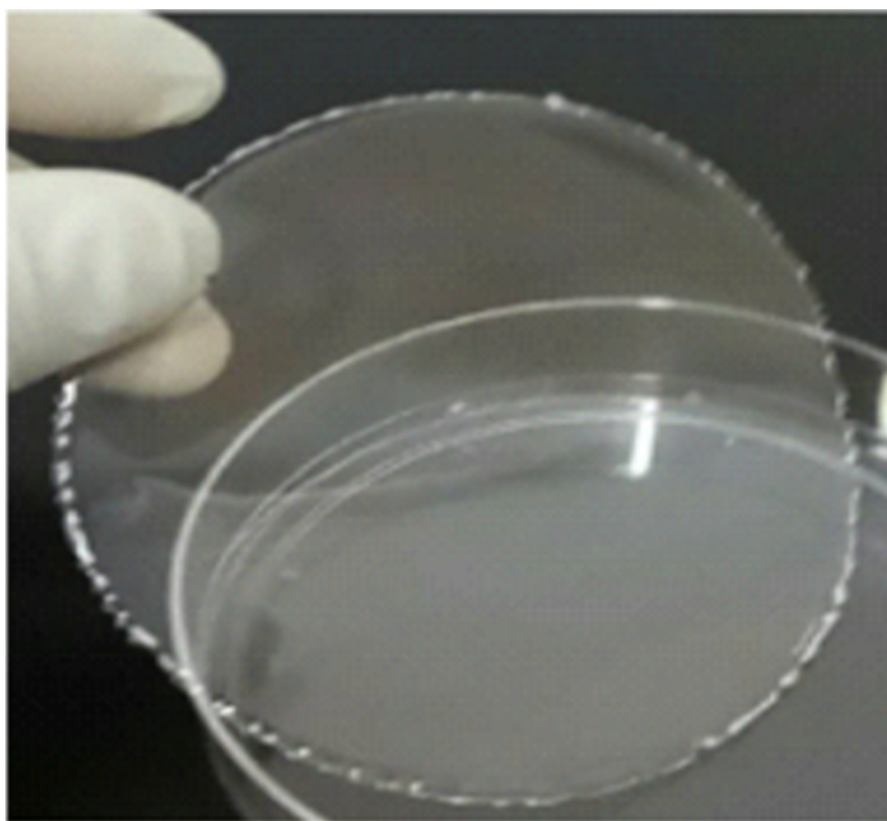

**Figure S1.** Macrograph of the ZMT-loaded OFDFs.

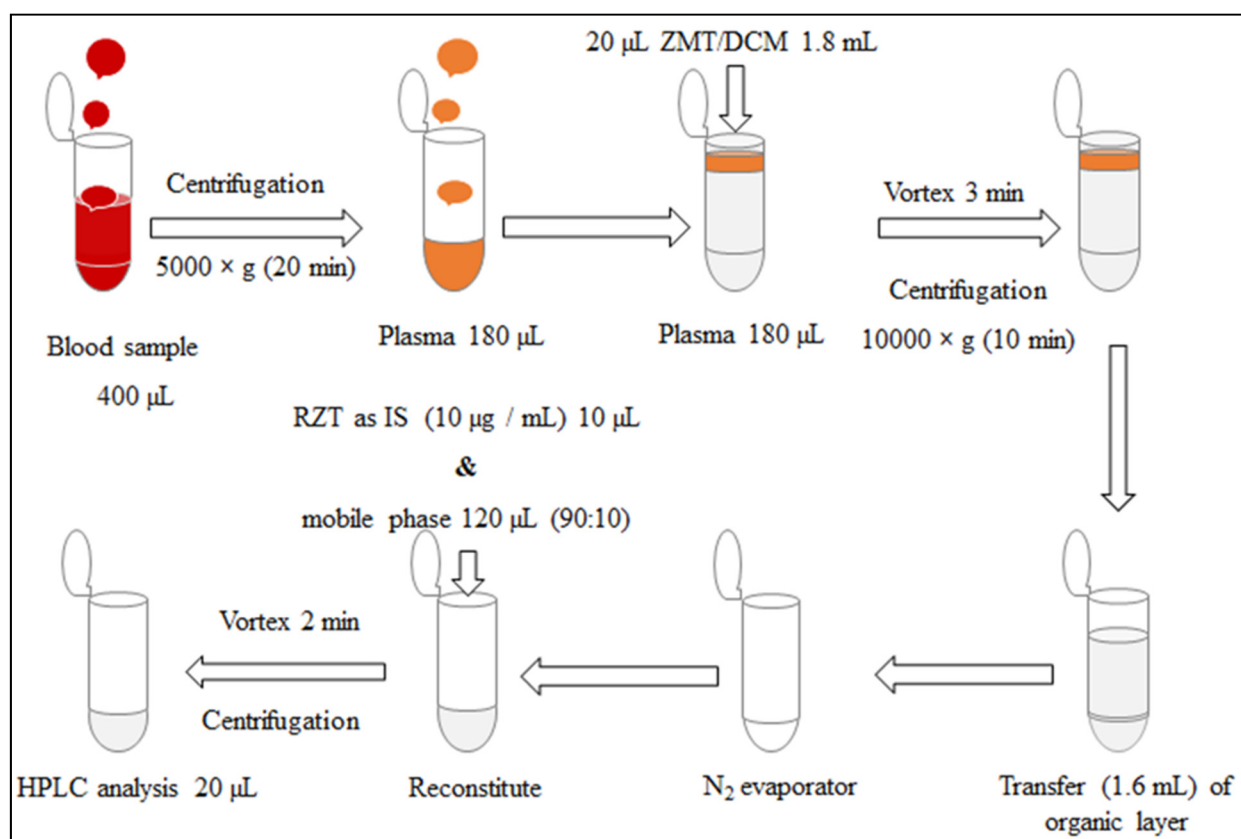

**Figure S2.** Schematic representation of blood sample treatment for pharmacokinetics studies using the rat model.

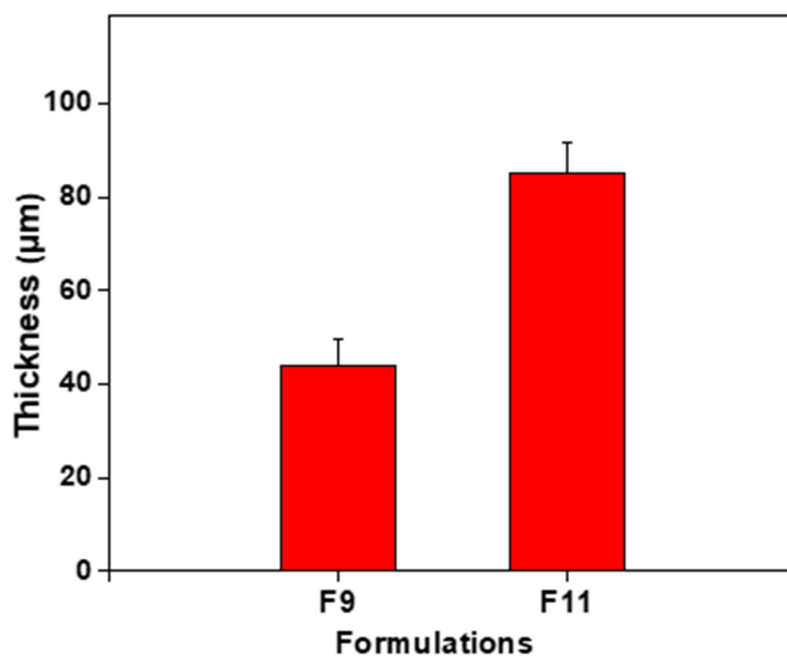

**Figure S3.** Effect of polymer concentrations on thickness of film.

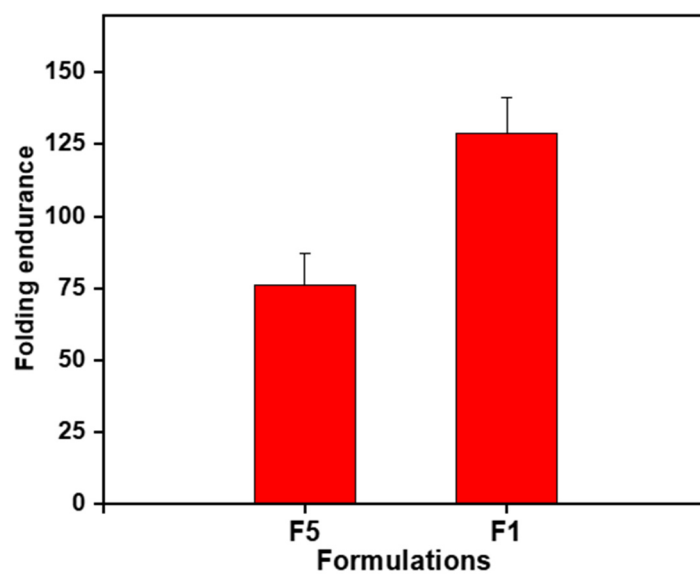

Figure S4. Effect of plasticizer concentration on folding endurance.

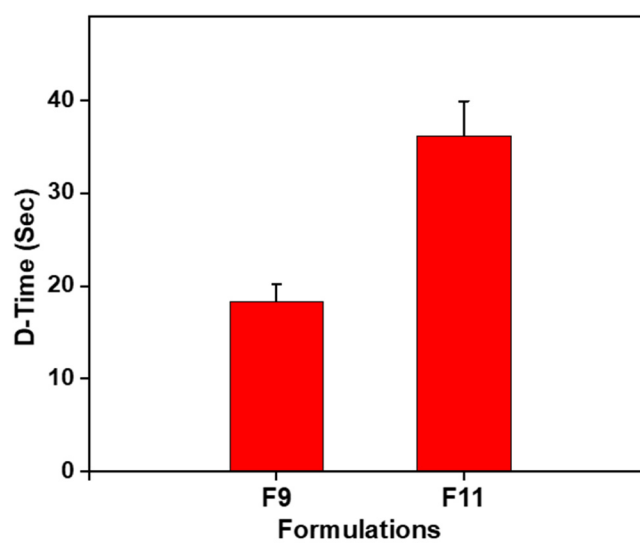

Figure S5. Effect of polymer concentrations on D-time.

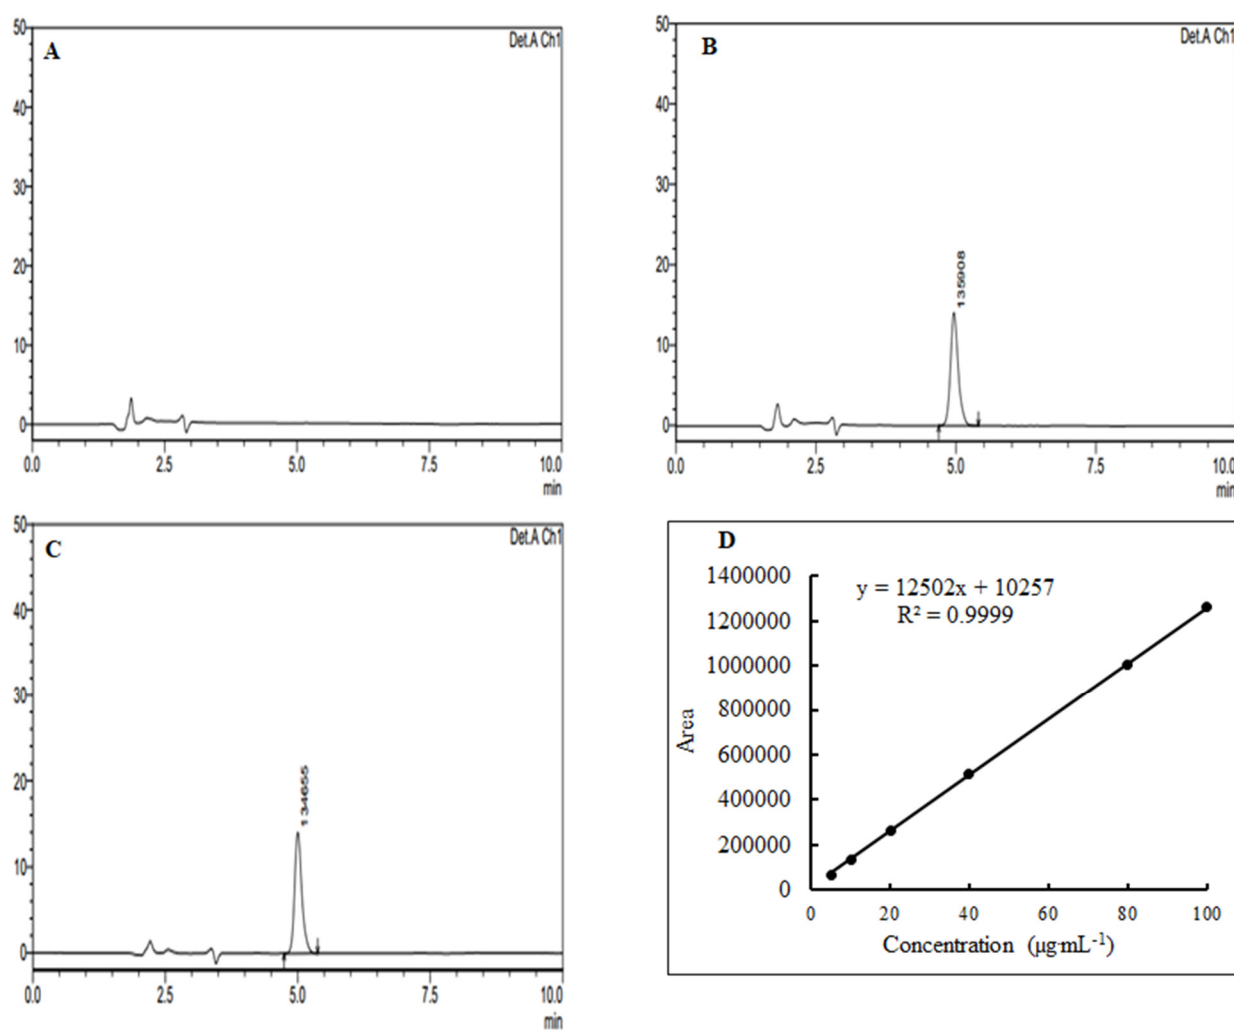

**Figure S6.** Typical chromatograms of blank solution (A), 10  $\mu\text{g}\cdot\text{mL}^{-1}$  standard solution (B), sample obtained after dissolution of ZMT-OFDFs (F1) at 5 min (C), typical calibration curve of ZMT in simulated saliva at pH 6.8 for in-vitro studies (D).

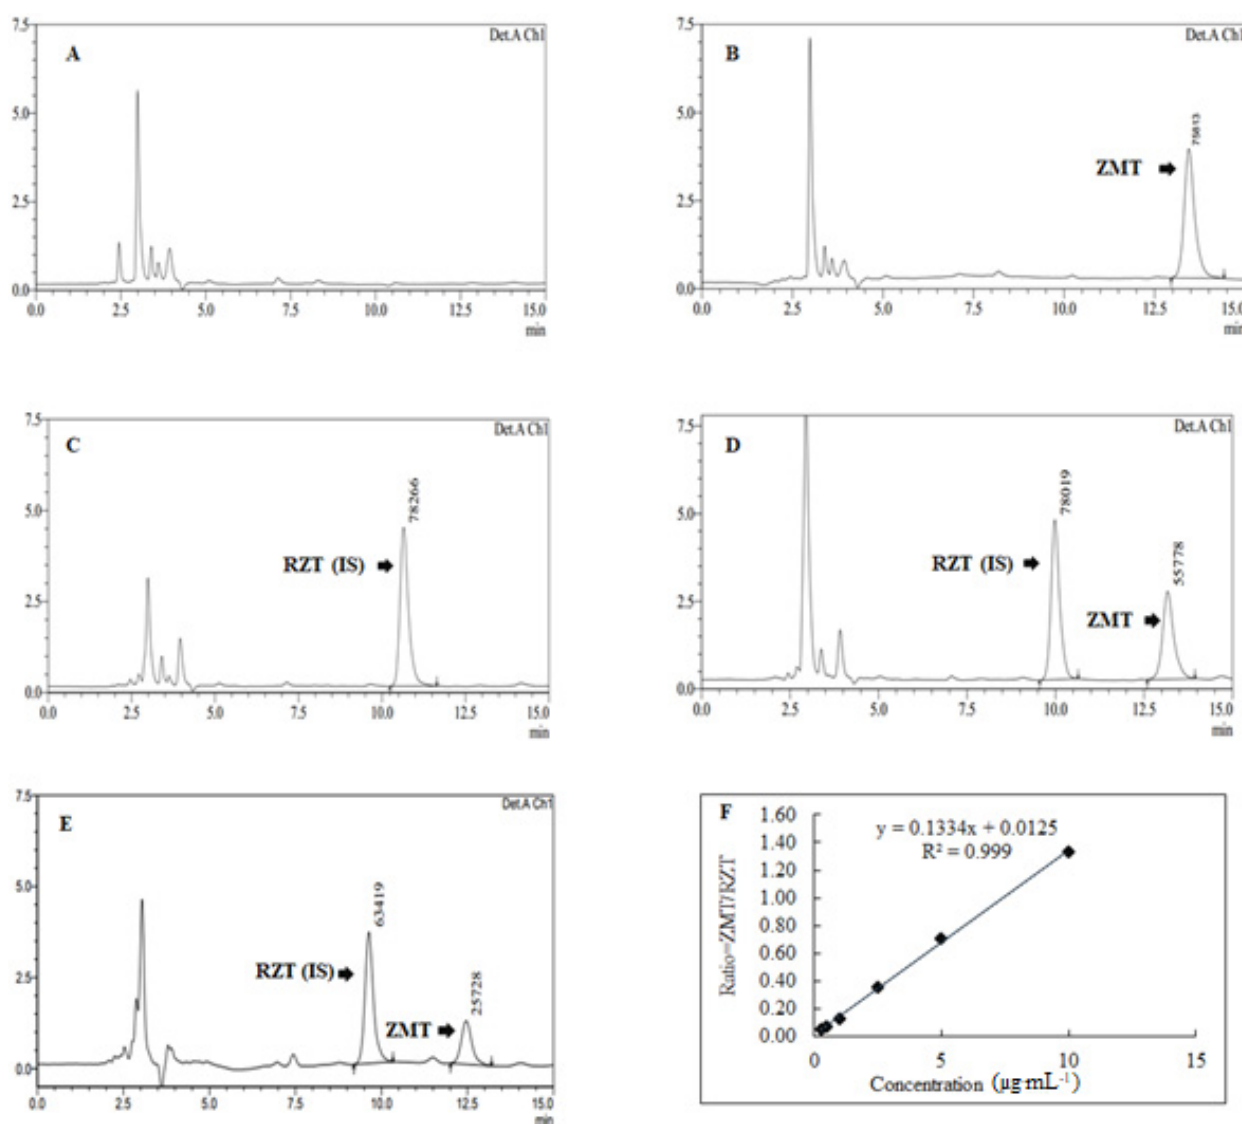

**Figure S7.** Representative chromatogram of blank rat plasma (A), plasma spiked with 10  $\mu\text{g}\cdot\text{mL}^{-1}$  ZMT (B), plasma spiked with 10  $\mu\text{g}\cdot\text{mL}^{-1}$  RZT (C), plasma spiked with ZMT-RZT (D), plasma sample taken at 0.5 h after oral administration of ZMT-OFDFs to rats (E), and a selected calibration curve of ZMT for in-vivo studies (F).

**Table S1.** Feasibility, pH, and drug content (%) determination of ZMT-OFDFs.

| Film Code | Stickiness | Surface Appearance | Film Clarity | Drug Content (%) | pH        |
|-----------|------------|--------------------|--------------|------------------|-----------|
| F1        | Non-sticky | Uniform            | Clear        | 96.4 ± 2.9       | 6.5 ± 0.5 |
| F2        | Non-sticky | Uniform            | Clear        | 98.7 ± 2.8       | 6.1 ± 0.2 |
| F3        | Non-sticky | Uniform            | Clear        | 100.1 ± 4.3      | 6.6 ± 0.7 |
| F4        | Non-sticky | Uniform            | Clear        | 99.1 ± 2.6       | 6.8 ± 0.3 |
| F5        | Non-sticky | Uniform            | Clear        | 98.2 ± 2.3       | 6.7 ± 0.8 |
| F6        | Non-sticky | Uniform            | Clear        | 95.3 ± 2.3       | 6.8 ± 0.7 |
| F7        | Non-sticky | Uniform            | Clear        | 99.6 ± 4.5       | 7.0 ± 0.2 |
| F8        | Non-sticky | Uniform            | Clear        | 98.8 ± 4.2       | 6.9 ± 0.6 |
| F9        | Non-sticky | Uniform            | Clear        | 102.9 ± 2.4      | 6.7 ± 0.7 |
| F10       | Non-sticky | Uniform            | Clear        | 97.5 ± 2         | 6.3 ± 0.3 |
| F11       | Non-sticky | Uniform            | Clear        | 99.9 ± 3.7       | 6.4 ± 0.5 |
| F12       | Non-sticky | Uniform            | Clear        | 99.5 ± 5.5       | 6.2 ± 0.1 |
| F13       | Non-sticky | Uniform            | Clear        | 96.6 ± 3.9       | 6.7 ± 0.8 |
